# Supplementary material for: Identification of potent human neutralizing antibodies against SARS-CoV-2 implications for development of therapeutics and prophylactics
Source: PubMed Central journal article supplement (PMC8352940; doi:10.1038/s41467-021-25153-x), 2021-08-09
Supplement: 41467_2021_25153_MOESM1_ESM.pdf [file 41467_2021_25153_MOESM1_ESM.pdf]

## **Supplementary Information**

**Identification of potent human neutralizing antibodies against SARS-CoV-2:  
implications for development of therapeutics and prophylactics**

*Zhao et al.*

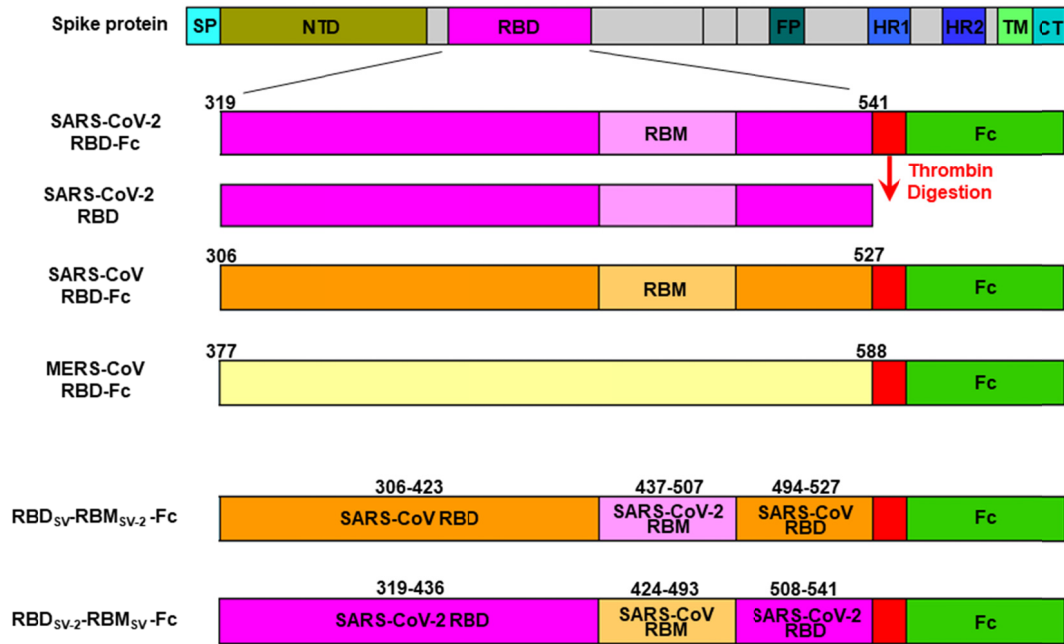

**Supplementary Figure 1. Construction of RBDs from different coronaviruses (CoVs).**

The CoV envelope protein (spike protein) contains a signal peptide (SP), N-terminal domain (NTD), receptor-binding domain (RBD) with a receptor-binding motif (RBM), fusion peptide (FP), heptad repeat 1 (HR1), heptad repeat 2 (HR2), transmembrane region/domain (TM), and cytoplasmic tail (CT). The RBD was fused with an antibody Fc fragment for the construction of RBD-Fc. The SARS-CoV-2 RBD-Fc could be digested by thrombin to obtain an isolated RBD. The chimeric RBDs, including RBD<sub>SV</sub>-RBM<sub>SV-2</sub>-Fc and RBD<sub>SV-2</sub>-RBM<sub>SV</sub>-Fc, were also constructed with the replacement of RBMs.

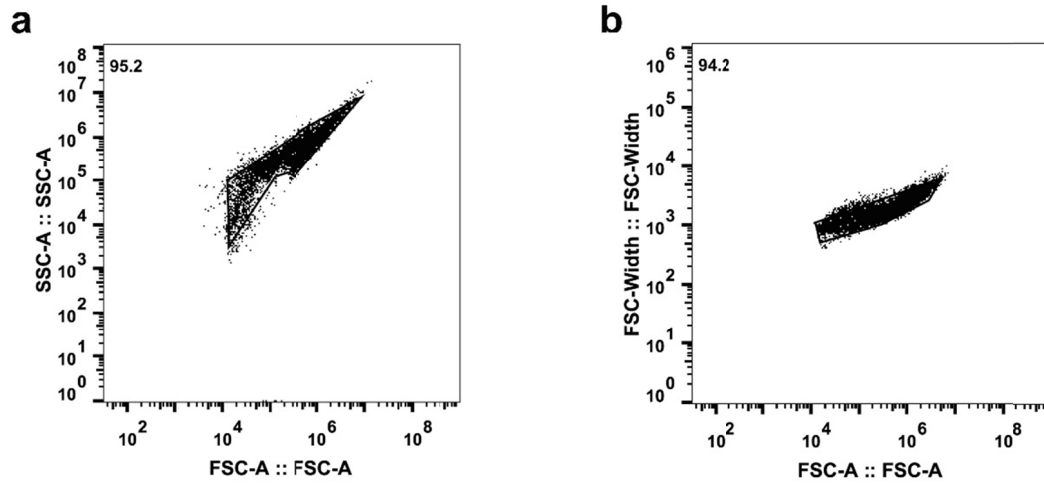

**Supplementary Figure 2. Gating strategy for cell analysis.** Cells were gated by flow cytometry (a) and cell aggregates (adherent cells) were excluded by FSC-A/FSC-Width (b).

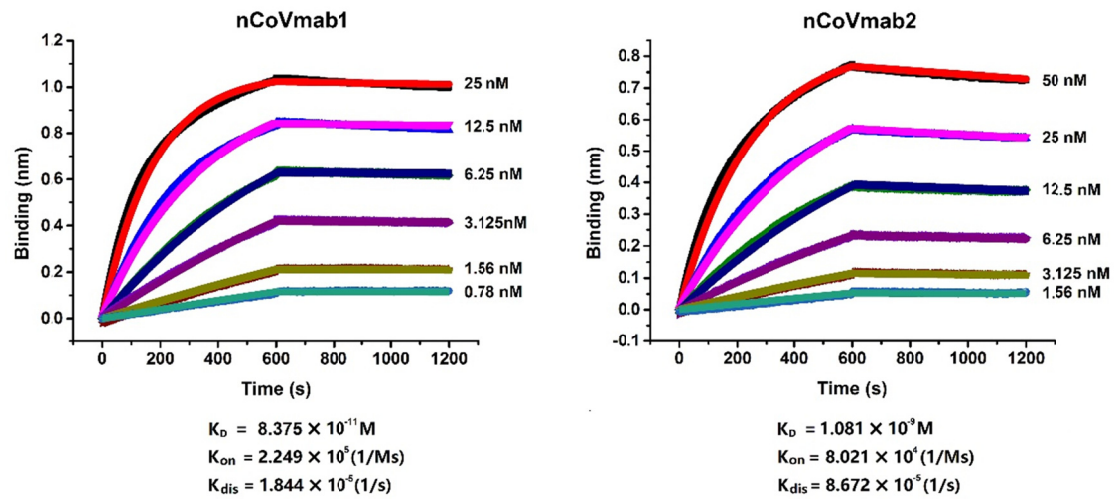

**Supplementary Figure 3. Measurement of binding kinetics.** The binding of SARS-CoV-2 RBD to biotinylated nCoVmab1 and nCoVmab2 was measured by BLI. Biotinylated nCoVmab1 and nCoVmab2 were loaded on the biosensors respectively. Serial diluted SARS-CoV-2 RBD was used for testing binding. Fast association and slow dissociation are observed. Source data are provided as a Source Data file.

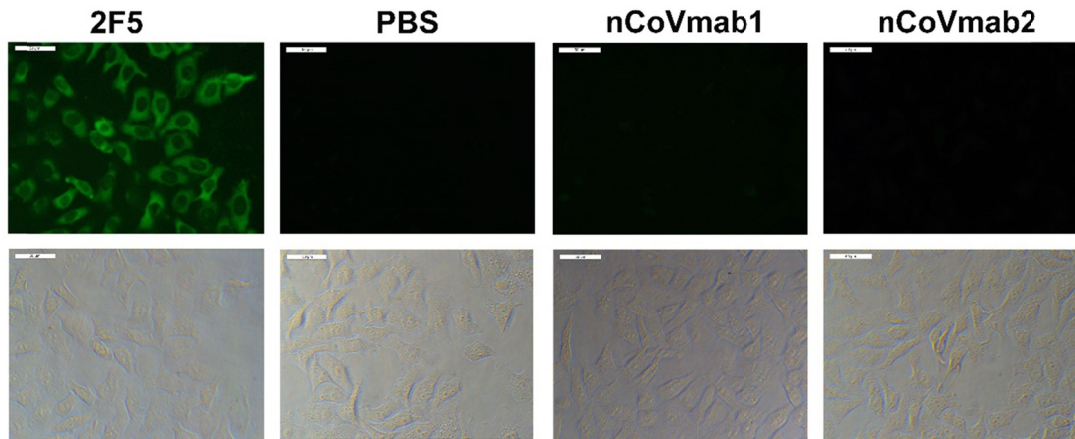

**Supplementary Figure 4. Analysis of nCoVmab1 and nCoVmab2 autoreactivity.** The binding of antibodies to HEp-2 epithelial cells was tested. 2F5 was added as a positive control, and a secondary antibody alone (PBS) was used as a negative control. The antibody concentration was 25  $\mu\text{g}/\text{ml}$ . All pictures were acquired with a fluorescence microscope and magnified by 40 $\times$  (scale bars, 50  $\mu\text{m}$ ). Data was performed with three independent experiments. Experiment was performed with duplicate samples. One representative is shown.

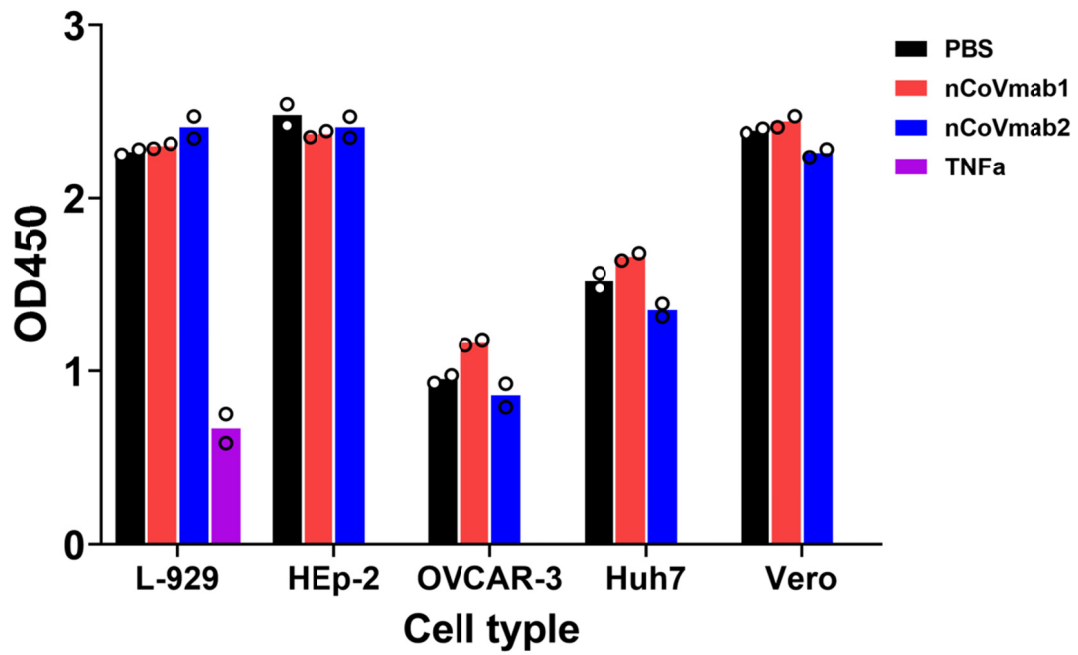

**Supplementary Figure 5. Evaluation of the cytotoxicity of nCoVmab1 and nCoVmab2 to different cell lines.** No detectable cytotoxicity was observed. By contrast, TNF $\alpha$ , as a positive control, was toxic to L-929 cells. Experiment was performed with duplicate samples. Source data are provided as a Source Data file.

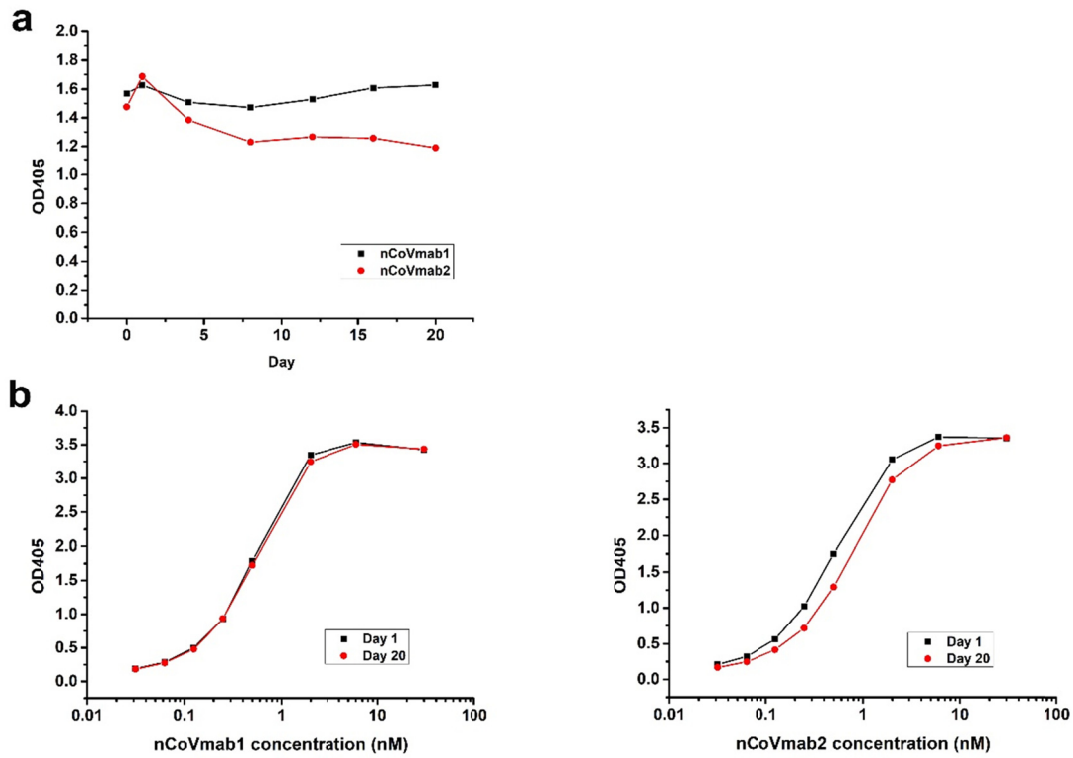

**Supplementary Figure 6. Stability analysis of nCoVmab1 and nCoVmab2.** (a) Samples from days 0, 1, 4, 8, 12, 16, and 20 were tested by binding to RBD-coated wells. The binding activity of nCoVmab2 slightly decreased compared with that of nCoVmab1. (b) Samples from days 1 and 20 were analyzed by an ELISA. No differences in the binding activities of nCoVmab1 were observed between the day 1 and day 20 samples, conversely, the binding ability of nCoVmab2 decreased after incubation. Experiment was performed with duplicate samples. Data are average values of two replicates. Source data are provided as a Source Data file.

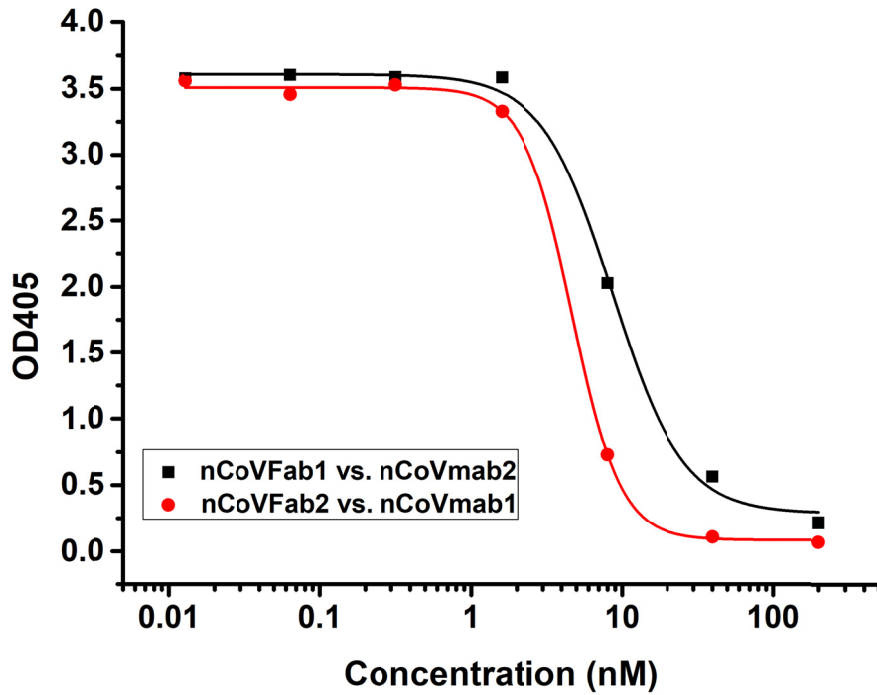

**Supplementary Figure 7. Competitive binding analysis between nCoV Fab1 and nCoV Fab2.** The competitive ELISA was used to analyze the relationship of the binding regions of the two antibodies. The black line represents competitive ELISA performed with fixed concentration of nCoV Fab1 and diluted nCoV mab2. The red line represents competitive ELISA performed with a fixed concentration of nCoV Fab2 and diluted nCoV mab1. They could almost completely compete with each other indicating that their epitopes highly overlap. Experiment was performed with duplicate samples. Data are average values of two replicates. Source data are provided as a Source Data file.



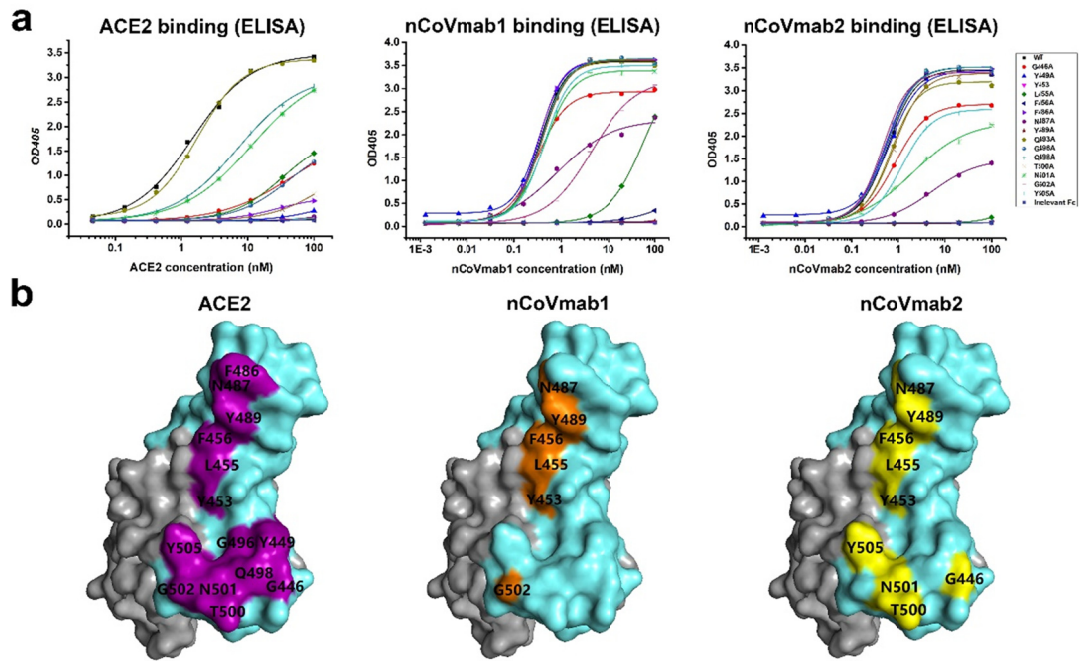

**Supplementary Figure 8. Alanine scanning of key residues.** (a) The binding of ACE2, nCoVmab1 and nCoVmab2 to different SARS-CoV-2 RBD mutants was measured by ELISA. Experiment was performed with duplicate samples. Data are average values of two replicates. Source data are provided as a Source Data file. (b) Surface representation of residues in RBD involved in binding. The RBM region is denoted in cyan. The key residues for binding to hACE2, nCoVmab1 and nCoVmab2 are colored in purple, orange and yellow, respectively.

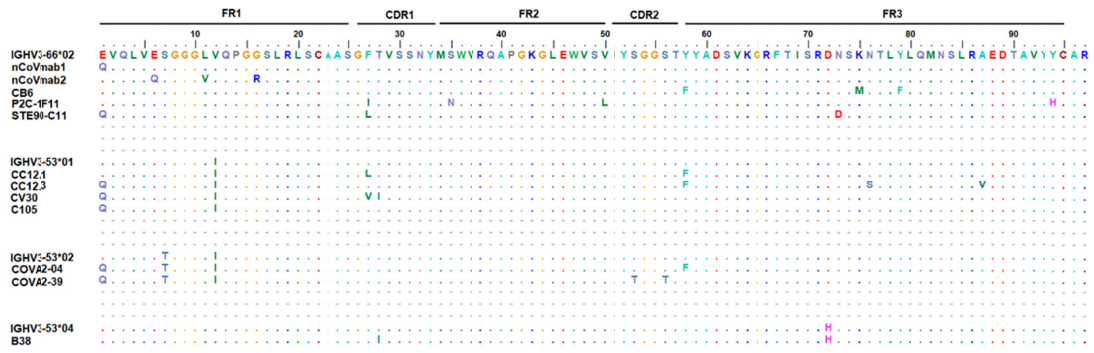

**Supplementary Figure 9. Germline sequence alignment.** Comparison of V<sub>H</sub> sequences of nCoVmab1, nCoVmab2 and a panel reported antibodies with the corresponding germline sequences. CDR, complementarity-determining region; FR: framework.

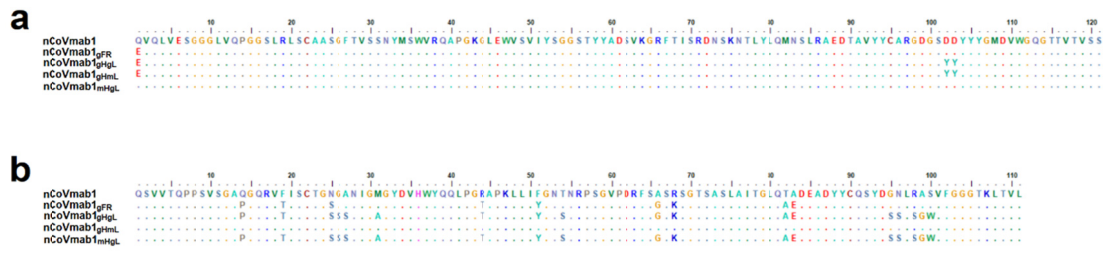

**Supplementary Figure 10. Construction of different germline formats of nCoVmab1.** **(a)** Heavy chain. **(b)** Light chain. nCoVmab1<sub>gFR</sub>, germline framework regions and mature CDRs; nCoVmab1<sub>gHgL</sub>, germline heavy chain and germline light chain; nCoVmab1<sub>gHmL</sub>, germline heavy chain and mature light chain; nCoVmab1<sub>mHgL</sub>, mature heavy chain and germline light chain.

**Supplementary Table 1. Microantiviral spread activity of nCoVmab1 and nCoVmab2 (I)**

| mAbs     | Concentration (µg/ml) |        |       |       |       |       |       |       |       | Virus | Cell |
|----------|-----------------------|--------|-------|-------|-------|-------|-------|-------|-------|-------|------|
|          | 50                    | 16.667 | 5.556 | 1.852 | 0.617 | 0.206 | 0.069 | 0.023 | 0.008 |       |      |
| nCoVmab1 | -                     | -      | -     | -     | +     | ++    | +++   | +++   | ++++  | ++++  | -    |
|          | -                     | -      | -     | -     | +     | ++    | +++   | ++++  | ++++  | ++++  | -    |
| nCoVmab2 | -                     | -      | +     | ++    | +++   | ++++  | ++++  | ++++  | ++++  | ++++  | -    |
|          | -                     | -      | +     | ++    | +++   | ++++  | ++++  | ++++  | ++++  | ++++  | -    |

  

| Control    | Concentration (µg/ml) |       |       |       |       |       |       |      | Virus | Cell |
|------------|-----------------------|-------|-------|-------|-------|-------|-------|------|-------|------|
|            | 4.821                 | 2.410 | 1.205 | 0.603 | 0.301 | 0.151 | 0.075 |      |       |      |
| Remdesivir | -                     | -     | +     | ++    | ++++  | ++++  | ++++  | ++++ | -     |      |
|            | -                     | -     | +     | +++   | ++++  | ++++  | ++++  | ++++ | -     |      |

“+” indicates that approximately 25% of cells in the well produced CPE caused by virus replication and spread, and “++++” indicates 100% CPE. “-” indicates that there was no virus plaque spread.

**Supplementary Table 2. Microantiviral spread activity of nCoVmab1 and nCoVmab2 (II)**

| mAbs     | Concentration (µg/ml) |        |       |       |       |       |       |       |       | Virus | Cell |
|----------|-----------------------|--------|-------|-------|-------|-------|-------|-------|-------|-------|------|
|          | 50                    | 16.667 | 5.556 | 1.852 | 0.617 | 0.206 | 0.069 | 0.023 | 0.008 |       |      |
| nCoVmab1 | -                     | -      | -     | -     | -     | 1     | +     | ++    | ++++  | ++++  | -    |
|          | -                     | -      | -     | -     | -     | 2     | +     | +++   | ++++  | ++++  | -    |
| nCoVmab2 | -                     | -      | -     | 1     | +     | ++    | +++   | ++++  | ++++  | ++++  | -    |
|          | -                     | -      | -     | 5     | +     | ++    | +++   | ++++  | ++++  | ++++  | -    |

  

| Control    | Concentration (µg/ml) |       |       |       |       |       |       |      | Virus | Cell |
|------------|-----------------------|-------|-------|-------|-------|-------|-------|------|-------|------|
|            | 4.821                 | 2.410 | 1.205 | 0.603 | 0.301 | 0.151 | 0.075 |      |       |      |
| Remdesivir | -                     | -     | +     | +++   | +++   | ++++  | ++++  | ++++ | -     |      |
|            | -                     | -     | +     | ++    | +++   | ++++  | ++++  | ++++ | -     |      |

“+” indicates that approximately 25% of cells in the well produced CPE caused by virus replication and spread, and “++++” indicates 100% CPE. “-” indicates that there was no virus plaque spread.

**Supplementary Table 3. Information of nCoVmab1, nCoVmab2 and a panel of reported antibodies**

| mAbs      | V <sub>H</sub>  | Identity (V <sub>H</sub> ) | HCDR3             | V <sub>L</sub>  | Identity (V <sub>L</sub> ) | LCDR3       | IC <sub>50</sub> (µg/ml) | Source                  |
|-----------|-----------------|----------------------------|-------------------|-----------------|----------------------------|-------------|--------------------------|-------------------------|
| nCoVmab1  | IGHV3-66*<br>02 | 98.95%                     | ARGDGSDDYYGMDV    | IGLV1-40*<br>02 | 90.97%                     | QSYDGNLRASV | 0.010 (Live virus)       | naïve<br>phage library  |
| nCoVmab2  | IGHV3-66*<br>02 | 98.25%                     | ARGDGSDDYYGMDV    | IGLV1-40*<br>01 | 98.26%                     | QSYDSSLGGSV | 0.139 (Live virus)       | naïve<br>phage library  |
| CB6       | IGHV3-66*<br>01 | 99.0%                      | ARVLPMYGDYLDY     | IGKV1-39*<br>01 | 99.6%                      | QQSYSTPPEYT | 0.036 (Live virus)       | convalescent<br>patient |
| P2C-1F11  | IGHV3-66*<br>02 | 95.9%                      | ARDLVVYGMDV       | IGKV3-20*<br>01 | 100.0%                     | QQYGSSPT    | 0.030 (pseudovirus)      | convalescent<br>patient |
| STE90-C11 | IGHV3-66*<br>02 | 98.6%                      | ARDVADAFDI        | IGKV1-9*<br>01  | 100%                       | QQLNSYPPFT  | 0.084 (Live virus)       | convalescent<br>patient |
| CC12.1    | IGHV3-53*<br>01 | 97.9%                      | ARDLDVYGLDV       | IGKV1-9*<br>01  | 97.9%                      | LNSYPPKFT   | 0.020 (pseudovirus)      | convalescent<br>patient |
| CC12.3    | IGHV3-53*<br>01 | 95.9%                      | ARDFGDFYFDY       | IGKV3-20*<br>01 | 99.0%                      | QQYGSSPRT   | 0.020 (pseudovirus)      | convalescent<br>patient |
| CV30      | IGHV3-53*<br>01 | 96.9%                      | ARDLDVSGGMDV      | IGKV3-20*<br>01 | 99.0%                      | QQYGSSPQT   | 0.030 (Live virus)       | convalescent<br>patient |
| C105      | IGHV3-53*<br>01 | 99.0%                      | ARGEGWELPYDY      | IGLV2-8*<br>01  | 97.0%                      | SSYEGSNFV   | 0.026 (pseudovirus)      | convalescent<br>patient |
| COVA2-04  | IGHV3-53*<br>02 | 97.9%                      | ARDLERAGGMDV      | IGKV3-20*<br>01 | 98.9%                      | QQYGSLYT    | 2.547 (Live virus)       | convalescent<br>patient |
| COVA2-39  | IGHV3-53*<br>02 | 96.9%                      | ARAHVDTAMVESGAFDI | IGLV2-23*<br>02 | 98.0%                      | CSYAGSSTWV  | 0.054 (Live virus)       | convalescent<br>patient |
| B38       | IGHV3-53*<br>04 | 99.0%                      | AREAYGMDV         | IGKV1-9*<br>01  | 97.9%                      | QQLNSYPPYT  | 0.177 (Live virus)       | convalescent<br>patient |
